# Supplementary material for: Fimasartan Ameliorates Nonalcoholic Fatty Liver Disease through PPARδ Regulation in Hyperlipidemic and Hypertensive Conditions
Source: Hindawi journal article supplement (doi:10.1155/2017/8048720), 2017-01-01

## **Additional Figure legends**

### **Additional Fig. 1 Peroxisome proliferator-activated receptor alpha (PPAR $\alpha$ ) in HepG2 cells treated with high fatty acid and fimasartan.**

Protein extracts were electrophoresed in 10% poly acrylamide gel and blotted to nitrocellulose membrane. The nitrocellulose membrane was bound with primary and secondary antibodies sequentially, and then the chemiluminescent signal was exposed to X-ray film. The density of bands on X-ray film was analyzed with Image J program. The results are expressed as means  $\pm$  SEM (n=3). Values were statistically analyzed by unpaired *t*-test. All experiments were repeated three times.

### **Additional Fig. 2 Peroxisome proliferator-activated receptor alpha (PPAR $\alpha$ ) in liver tissues of SHR administered with high fat diet and fimasartan.**

Protein extracts were electrophoresed in 10% poly acrylamide gel and blotted to nitrocellulose membrane. The nitrocellulose membrane was bound with primary and secondary antibodies sequentially, and then the chemiluminescent signal was exposed to X-ray film. The density of bands on X-ray film was analyzed with Image J program. The results are expressed as means  $\pm$  SEM (n=6). Values were statistically analyzed by unpaired *t*-test. All experiments were repeated three times.

Meaning of indications: S60 means SHR administered with high fat diet containing 60% fat , and S60F means SHR administered with high fat diet containing 60% fat plus fimasartan.

**Additional Fig. 1**

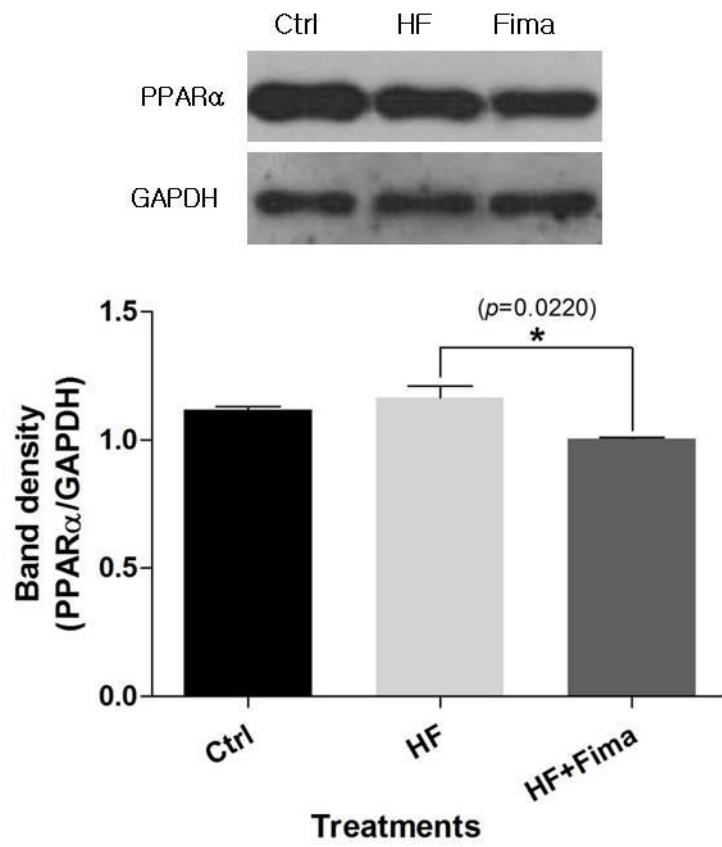

**Additional Fig. 2**

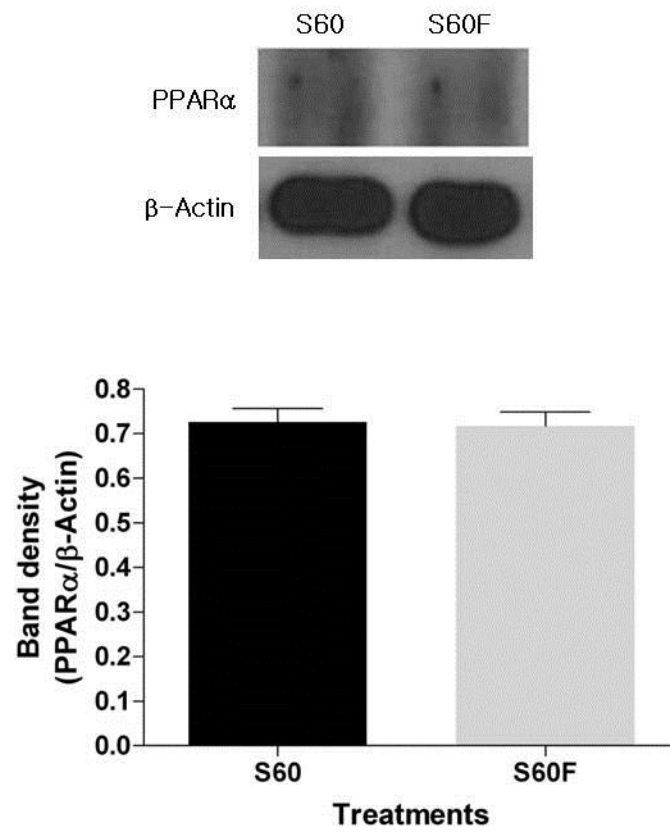

Supplement: f1 [file 8048720.f1.pdf]
